# Supplementary material for: SNNRice6mA: A Deep Learning Method for Predicting DNA N6-Methyladenine Sites in Rice Genome
Source: PubMed Central journal article supplement (PMC6797597; doi:10.3389/fgene.2019.01071), 2019-10-11
Supplement: DataSheet_1.pdf [file DataSheet_1.pdf]

## Supplementary Materials

### 1 Supplementary Figures

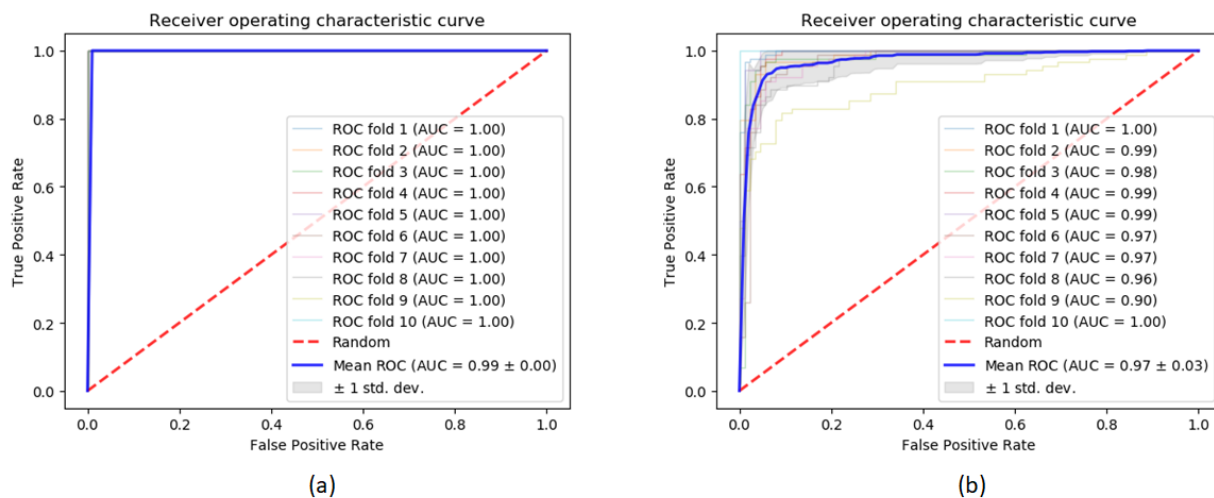

**Figure S1.** ROC curves of SNNRice6mA on training set and validation set of 6mA-rice-Chen dataset. (a) The performance on the training set. (b) The performance on the validation set.

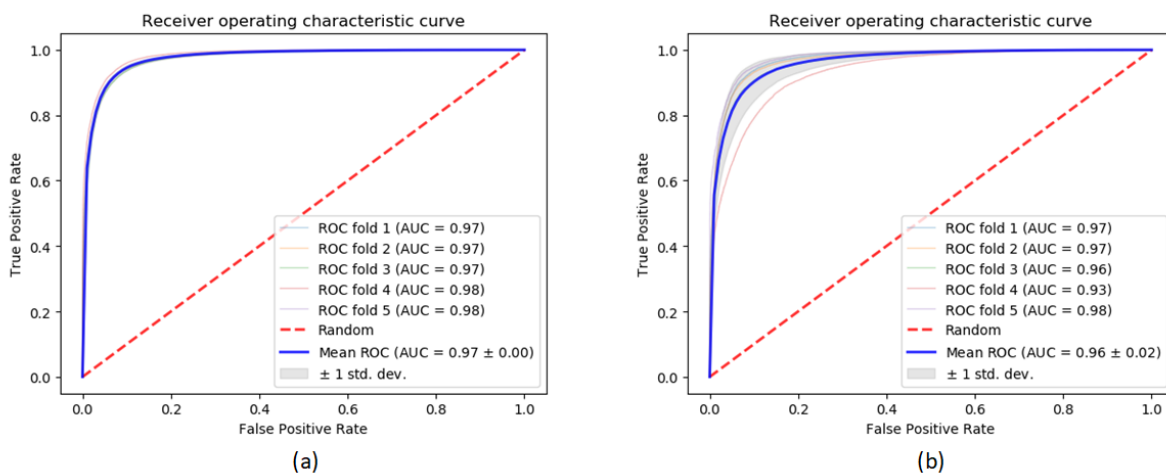

**Figure S2.** ROC curves of SNNRice6mA on training set and validation set of 6mA-rice-Lv dataset. (a) The performance on the training set. (b) The performance on the validation set.

## Gateway Timeout

The gateway did not receive a timely response from the upstream server or application.

*Apache/2.4.7 (Ubuntu) Server at thegleelab.org Port 80*

Figure S3 Error message when using the SDM6A tool on 6mA-mouse-Feng dataset (<http://thegleelab.org/SDM6A/index.html>).

### NOTE:

Due to lack information for the front and rear 20nt of a sequence, just give the position of 'A' sites with no prediction:

Figure S4 Error message when using the iDNA6mA-Rice tool on 6mA-mouse-Feng dataset (<http://lin-group.cn/server/iDNA6mA-Rice/service.html>).

## 2 Supplementary Tables

Table S1 Hyper-parameters of SNNRice6mA

| Hyper-parameter              | Value  |
|------------------------------|--------|
| Number of filters            | 16     |
| Kernel size of filter        | 4      |
| Number of groups in GN layer | 4      |
| Regularization rate          | 0.0001 |
| Dropout rate                 | 0.25   |
| Hidden units in FC layer     | 32     |
| Learning rate                | 0.005  |
| Momentum rate                | 0.95   |
| Batch size                   | 32     |

Table S2 Performance of SNNRice6mA on 6mA-rice-Chen dataset

| Metric                    | Training set     | Validation set   | Testing set      |
|---------------------------|------------------|------------------|------------------|
| Sensitivity (%)           | $99.94 \pm 0.09$ | $92.84 \pm 6.14$ | $92.16 \pm 5.76$ |
| Specificity (%)           | $99.99 \pm 0.04$ | $93.75 \pm 3.22$ | $94.32 \pm 2.87$ |
| Accuracy (%)              | $99.96 \pm 0.07$ | $93.30 \pm 4.10$ | $93.24 \pm 3.71$ |
| MCC                       | $1.00 \pm 0.00$  | $0.87 \pm 0.08$  | $0.87 \pm 0.07$  |
| AUC                       | $0.99 \pm 0.00$  | $0.97 \pm 0.03$  | $0.97 \pm 0.02$  |
| Precision (%)             | $99.99 \pm 0.04$ | $93.68 \pm 3.21$ | $94.19 \pm 2.92$ |
| F1-Score (%)              | $99.97 \pm 0.07$ | $93.19 \pm 4.31$ | $93.09 \pm 3.91$ |
| Binary cross entropy Loss | $0.01 \pm 0.01$  | $0.21 \pm 0.13$  | $0.22 \pm 0.12$  |

Table S3 Performance of SNNRice6mA on 6mA-rice-Lv dataset

| Metric                    | Training set     | Validation set   | Testing set      |
|---------------------------|------------------|------------------|------------------|
| Sensitivity (%)           | $94.01 \pm 0.41$ | $93.68 \pm 0.36$ | $93.67 \pm 0.41$ |
| Specificity (%)           | $90.66 \pm 0.52$ | $86.18 \pm 6.05$ | $86.74 \pm 3.93$ |
| Accuracy (%)              | $92.34 \pm 0.44$ | $89.93 \pm 3.10$ | $90.20 \pm 1.92$ |
| MCC                       | $0.85 \pm 0.01$  | $0.80 \pm 0.06$  | $0.81 \pm 0.04$  |
| AUC                       | $0.97 \pm 0.00$  | $0.96 \pm 0.02$  | $0.96 \pm 0.01$  |
| Precision (%)             | $90.96 \pm 0.49$ | $87.40 \pm 4.61$ | $87.71 \pm 3.07$ |
| F1-Score (%)              | $92.46 \pm 0.42$ | $90.37 \pm 2.62$ | $90.56 \pm 1.64$ |
| Binary cross entropy Loss | $0.20 \pm 0.01$  | $0.25 \pm 0.07$  | $0.25 \pm 0.04$  |
